# Supplementary material
Source: PubMed Central journal article supplement (PMC11003768)
Supplement: NIHMS1980957-supplement-Supplement.pdf [file NIHMS1980957-supplement-Supplement.pdf]

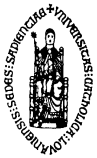

## Data Supplement

### Prevalence, Treatment and Control Rates of Conventional and Ambulatory Hypertension across 10 Populations in 3 Continents

Running Title: Prevalence, Treatment and Control of Hypertension

Jesus Melgarejo, Gladys E. Maestre, Lutgarde Thijs, Kei Asayama, José Boggia, Edoardo Casiglia, Tine W. Hansen, Yutaka Imai, Lotte Jacobs, Jørgen Jeppesen, Kalina Kawecka-Jaszcz, Tatiana Kuznetsova, Yan Li, Sofia Malyutina, Yuri Nikitin, Takayoshi Ohkubo, Katarzyna Stolarz-Skrzypek, Ji-Guang Wang, Jan A. Staessen, on behalf of the International Database on Ambulatory blood pressure in relation to Cardiovascular Outcomes (IDACO) Investigators

Tables 7, Figures 2

**Correspondence:**

Jan A. Staessen, MD, PhD,  
Studies Coordinating Centre,  
Research Unit Hypertension and Cardiovascular Epidemiology,  
KU Leuven Department of Cardiovascular Sciences,  
University of Leuven,  
Campus Sint Rafaël,  
Kapucijnenvoer 35, Box 7001,  
BE-3000 Leuven, Belgium

Telephone: +32-16-34-7104 (office)  
+32-47-632-4928 (mobile)

Facsimile: +32-16-34-7106 (office)

email: [jan.staessen@med.kuleuven.be](mailto:jan.staessen@med.kuleuven.be)  
[ja.staessen@maastrichtuniversity.nl](mailto:ja.staessen@maastrichtuniversity.nl)

Laboratorio de Neurociencias and Instituto Cardiovascular, Universidad del Zulia, Maracaibo, Venezuela (JM, GEM); Department of Biomedical Sciences, University of Texas Rio Grande Valley School of Medicine, Brownsville, USA (GEM); Tohoku University Graduate School of Pharmaceutical Sciences, Sendai, Japan (KA, YI); Studies Coordinating Centre, Department of Hygiene and Public Health, Teikyo University School of Medicine, Tokyo, Japan (KA, TO); Centro de Nefrología and Departamento de Fisiopatología, Hospital de Clínicas, Universidad de la República, Montevideo, Uruguay (JB); Department of Medicine, University of Padua, Padua, Italy (EC); the Steno Diabetes Center Copenhagen, Gentofte and RCPH, Centre for Health, Capital Region of Denmark, Denmark (TWH); KU Leuven Department of Cardiovascular Sciences, University of Leuven, Belgium (LJ, TK, LT, JAS); Department of Medicine, Glostrup Hospital, University of Copenhagen, Denmark (JJ); the First Department of Cardiology, Interventional Electrophysiology and Hypertension, Jagiellonian University Medical College, Krakow, Poland (KKJ, KSS); Research Unit Hypertension and Cardiovascular Epidemiology, Center for Epidemiological Studies and Clinical Trials and Center for Vascular Evaluation, Ruijin Hospital, Shanghai Jiaotong University School of Medicine, Shanghai, China (YL, J-GW); Institute of Internal and Preventive Medicine, Novosibirsk, Russian Federation (TK, SM, YN); R & D Group VitaK, Maastricht University, Maastricht, The Netherlands (JAS).

Correspondence to Jan A. Staessen, Studies Coordinating Centre, Research Unit Hypertension and Cardiovascular Epidemiology, KU Leuven Department of Cardiovascular Sciences, University of Leuven, Campus Sint Rafaël, Kapucijnenvoer 35, Box 7001, BE-3000 Leuven, Belgium. Email [jan.staessen@med.kuleuven.be](mailto:jan.staessen@med.kuleuven.be) or [ja.staessen@maastrichtuniversity.nl](mailto:ja.staessen@maastrichtuniversity.nl)

**Table S1.** Terminal Digit Preference of the Conventional Blood Pressure Measurements by Cohort.

| IDACO Cohorts         | N    | Terminal digit |      |      |      |      |     |      |     |      |      |
|-----------------------|------|----------------|------|------|------|------|-----|------|-----|------|------|
|                       |      | 0              | 1    | 2    | 3    | 4    | 5   | 6    | 7   | 8    | 9    |
| Copenhagen, Denmark   | 8568 | 26.4           |      | 17.6 |      | 19.6 |     | 18.7 |     | 17.6 |      |
| Nooderkempen, Belgium | 3770 | 28.3           |      | 18.6 |      | 18.5 |     | 16.4 |     | 18.2 |      |
| Montevideo, Uruguay   | 3848 | 10.1           | 12.1 | 11.5 | 10.3 | 9.2  | 9.7 | 9.2  | 8.6 | 9.4  | 10.1 |
| JingNing, China       | 756  | 14.2           |      | 20.4 |      | 20.8 |     | 20.5 |     | 24.2 |      |
| EPOGH                 | 1964 | 24.0           | 0.8  | 18.1 | 0.8  | 15.9 | 1.1 | 18.0 | 0.8 | 19.9 | 0.5  |

Values are total number of BP readings (N) and percentage of BP readings ending in the corresponding digit.

Terminal digit preference could not be assessed in the Ohasama and Maracaibo cohorts because BP was recorded as the mean of respectively two and three consecutive measurements.

**Table S2.** Number of 24-h Ambulatory Blood Pressure Readings in the IDACO Cohorts.

| IDACO Cohorts         | N° of Subjects | Programmed Interval between Readings (minutes) |            | N° of Programmed Readings | N° of Recorded Readings |    |     |     |     |
|-----------------------|----------------|------------------------------------------------|------------|---------------------------|-------------------------|----|-----|-----|-----|
|                       |                | Daytime                                        | Night-time |                           | Median                  | P5 | P25 | P75 | P95 |
| Copenhagen, Denmark   | 2142           | 15                                             | 30         | 80                        | 80                      | 68 | 78  | 81  | 83  |
| Ohasama, Japan        | 1275           | 30                                             | 30         | 48                        | 45                      | 36 | 42  | 48  | 50  |
| Nooderkempen, Belgium | 943            | 20                                             | 40         | 55                        | 53                      | 38 | 42  | 56  | 58  |
| Montevideo, Uruguay   | 962            | 20                                             | 40         | 60                        | 37                      | 29 | 34  | 39  | 42  |
| JingNing, China       | 189            | 20                                             | 45         | 65                        | 56                      | 53 | 55  | 56  | 57  |
| EPOGH                 | 491            | 15                                             | 30         | 76                        | 74                      | 59 | 70  | 77  | 83  |
| Maracaibo, Venezuela  | 544            | 15                                             | 30         | 82                        | 67                      | 52 | 61  | 71  | 77  |

**Table S3.** Characteristics of the Participants by Cohort (Starts)

|                                    | <b>Copenhagen1<br/>(n=2142)</b> | <b>Ohasama2<br/>(n=1275)</b> | <b>Noorderkempen3<br/>(n=943)</b> | <b>Montevideo4<br/>(n=962)</b> | <b>JingNing5<br/>(n=189)</b> |
|------------------------------------|---------------------------------|------------------------------|-----------------------------------|--------------------------------|------------------------------|
| Number with characteristics (%)    |                                 |                              |                                   |                                |                              |
| Women                              | 1026 (47.9)                     | 839 (65.8)                   | 468 (49.6)                        | 522 (54.3)                     | 103 (54.5)                   |
| Current smoking                    | 930 (43.5)                      | 233 (18.3)                   | 257 (27.5)                        | 193 (20.1)                     | 61 (32.3)                    |
| Drinking alcohol                   | 1840 (86.4)                     | 255 (22.1)                   | 226 (24.4)                        | 342 (35.6)                     | 93 (49.2)                    |
| Diabetes                           | 73 (3.4)                        | 223 (17.5)                   | 37 (3.9)                          | 75 (7.8)                       | 0 (0.0)                      |
| Obesity                            | 330 (15.4)                      | 32 (2.5)                     | 152 (16.1)                        | 245 (25.5)                     | 4 (2.1)                      |
| Dyslipidemia                       | 1014 (47.3)                     | 100 (7.8)                    | 335 (35.5)                        | 358 (37.2)                     | 19 (10.0)                    |
| History of cardiovascular disease  | 128 (6.0)                       | 66 (5.2)                     | 108 (11.4)                        | 81 (8.4)                       | 8 (4.2)                      |
| Mean characteristic (SD)           |                                 |                              |                                   |                                |                              |
| Age, years                         | 56.4 (10.3)                     | 61.0 (9.2)                   | 55.1 (10.5)                       | 57.3 (10.3)                    | 56.8 (11.0)                  |
| Body mass index, kg/m <sup>2</sup> | 26.0 (4.1)                      | 23.5 (3.0)                   | 26.5 (4.3)                        | 27.5 (4.5)                     | 22.5 (3.0)                   |
| Total serum cholesterol, mmol/L    | 6.21 (1.10)                     | 5.01 (0.88)                  | 5.85 (1.11)                       | 5.93 (1.11)                    | 4.96 (1.04)                  |
| Blood pressure                     |                                 |                              |                                   |                                |                              |
| Conventional systolic, mm Hg       | 131.2 (19.2)                    | 130.8 (18.3)                 | 129.6 (18.2)                      | 134.6 (23.9)                   | 139.4 (24.5)                 |
| Conventional diastolic, mm Hg      | 83.3 (10.7)                     | 74.1 (11.3)                  | 78.4 (10.2)                       | 83.4 (12.6)                    | 82.3 (11.5)                  |
| 24-h systolic, mm Hg               | 128.6 (12.8)                    | 122.8 (13.0)                 | 119.7 (11.8)                      | 122.9 (15.1)                   | 126.9 (16.2)                 |
| 24-h diastolic, mm Hg              | 75.1 (8.5)                      | 71.9 (7.7)                   | 72.2 (7.5)                        | 76.9 (9.1)                     | 80.2 (9.1)                   |
| Daytime systolic, mm Hg            | 136.4 (13.6)                    | 128.7 (14.2)                 | 125.6 (12.3)                      | 127.6 (16.0)                   | 131.1 (16.7)                 |
| Daytime diastolic, mm Hg           | 80.5 (9.2)                      | 76.1 (8.7)                   | 77.7 (8.3)                        | 85.1 (10.3)                    | 84.0 (9.4)                   |
| Nighttime systolic, mm Hg          | 115.8 (14.0)                    | 111.3 (14.5)                 | 109.4 (12.9)                      | 112.6 (16.0)                   | 118.4 (17.5)                 |
| Nighttime diastolic, mm Hg         | 65.7 (9.1)                      | 63.5 (8.2)                   | 63.2 (8.3)                        | 67.4 (9.8)                     | 73.7 (10.2)                  |

Data are mean (SD) or number of subjects (%). Diabetes mellitus is the use of antidiabetic drugs, a fasting glucose of at least 7.0 mmol/L, a random glucose of at least 11.1 mmol/L, a self-reported diagnosis, or diabetes documented in practice or hospital records. Obesity is a body mass index > 30 kg/m<sup>2</sup>. Dyslipidemia is a total cholesterol ≥6.2 mmol/L.

**Table S3.** Characteristics of the Participants by Cohort (Continues)

|                                    | <b>Novosibirsk6<br/>(n=115)</b> | <b>Pilsen7<br/>(n=76)</b> | <b>Padua7<br/>(n=161)</b> | <b>Krakow7<br/>(n=139)</b> | <b>Maracaibo8<br/>(n=544)</b> |
|------------------------------------|---------------------------------|---------------------------|---------------------------|----------------------------|-------------------------------|
| Number with characteristics (%)    |                                 |                           |                           |                            |                               |
| Women                              | 50 (43.4)                       | 34 (44.7)                 | 92 (57.1)                 | 83 (59.7)                  | 174 (32.0)                    |
| Current smoking                    | 25 (20.9)                       | 19 (25.0)                 | 30 (18.6)                 | 45 (32.4)                  | 87 (16.0)                     |
| Drinking alcohol                   | 100 (87.0)                      | 49 (64.5)                 | 94 (58.4)                 | 44 (31.6)                  | 175 (32.2)                    |
| Diabetes                           | 6 (5.2)                         | 8 (10.5)                  | 11 (6.8)                  | 13 (9.4)                   | 131 (24.2)                    |
| Obesity                            | 37 (32.2)                       | 23 (30.3)                 | 30 (18.6)                 | 48 (34.5)                  | 150 (27.6)                    |
| Dyslipidaemia                      | 31 (27.0)                       | 25 (32.9)                 | 58 (36.0)                 | 36 (25.9)                  | 108 (19.8)                    |
| History of cardiovascular disease  | 33 (28.7)                       | 6 (7.9)                   | 18 (11.2)                 | 27 (19.4)                  | 64 (11.9)                     |
| Mean characteristic (SD)           |                                 |                           |                           |                            |                               |
| Age, years                         | 54.1 (7.1)                      | 51.1 (5.1)                | 54.3 (4.0)                | 50.5 (4.9)                 | 66.4 (6.5)                    |
| Body mass index, kg/m <sup>2</sup> | 28.0 (4.9)                      | 28.0 (4.2)                | 27.1 (4.0)                | 28.7 (4.8)                 | 27.3 (5.3)                    |
| Total serum cholesterol, mmol/L    | 5.67 (1.14)                     | 5.83 (1.12)               | 5.72 (1.08)               | 5.61 (1.08)                | 5.49 (1.34)                   |
| Blood pressure                     |                                 |                           |                           |                            |                               |
| Conventional systolic, mm Hg       | 134.5 (19.3)                    | 130.8 (20.2)              | 130.6 (17.7)              | 134.9 (15.1)               | 169.5 (31.9)                  |
| Conventional diastolic, mm Hg      | 83.7 (12.0)                     | 81.5 (11.4)               | 82.0 (10.2)               | 86.9 (9.8)                 | 87.0 (15.0)                   |
| 24-h systolic, mm Hg               | 125.4 (14.2)                    | 120.2 (14.2)              | 126.4 (11.6)              | 123.9 (11.8)               | 131.4 (16.0)                  |
| 24-h diastolic, mm Hg              | 77.5 (9.2)                      | 75.4 (8.5)                | 77.1 (6.9)                | 76.2 (7.9)                 | 75.6 (9.8)                    |
| Daytime systolic, mm Hg            | 130.6 (14.5)                    | 125.6 (15.1)              | 133.1 (12.3)              | 130.3 (12.4)               | 134.2 (16.7)                  |
| Daytime diastolic, mm Hg           | 82.3 (9.9)                      | 79.8 (8.8)                | 81.5 (7.2)                | 81.7 (8.2)                 | 77.7 (10.4)                   |
| Nighttime systolic, mm Hg          | 115.3 (15.2)                    | 109.4 (14.4)              | 113.4 (13.8)              | 112.3 (12.4)               | 125.3 (18.4)                  |
| Nighttime diastolic, mm Hg         | 68.2 (9.4)                      | 66.7 (9.4)                | 67.6 (8.6)                | 66.3 (9.2)                 | 70.2 (11.3)                   |

Data are mean (SD) or number of subjects (%). Diabetes mellitus is the use of antidiabetic drugs, a fasting glucose of at least 7.0 mmol/L, a random glucose of at least 11.1 mmol/L, a self-reported diagnosis, or diabetes documented in practice or hospital records. Obesity is a body mass index > 30 kg/m<sup>2</sup>. Dyslipidemia is a total cholesterol ≥6.2 mmol/L.

**Table S4.**

Prevalence of Conventional Hypertension by Cohort, Sex and Age.

| Cohort        | Men         |             |             | Women       |             |             | 40-59 years |             |             | 60-79 years |             |             |
|---------------|-------------|-------------|-------------|-------------|-------------|-------------|-------------|-------------|-------------|-------------|-------------|-------------|
|               | N           | Cases       | Crude rate  |
| Copenhagen    | 1116        | 520         | 46.6        | 1026        | 432         | 42.1        | 1067        | 316         | 29.6        | 1075        | 636         | 59.2        |
| Ohasama       | 436         | 236         | 54.1        | 839         | 355         | 42.3        | 572         | 171         | 29.9        | 703         | 420         | 59.7        |
| Noorderkempen | 475         | 186         | 39.2        | 468         | 191         | 40.8        | 641         | 189         | 29.5        | 302         | 188         | 62.3        |
| Montevideo    | 440         | 242         | 55.0        | 522         | 246         | 47.1        | 578         | 237         | 41.0        | 384         | 251         | 65.4        |
| JingNing      | 86          | 38          | 44.2        | 103         | 56          | 54.4        | 115         | 50          | 43.5        | 74          | 44          | 59.5        |
| EPOGH         | 209         | 103         | 49.3        | 282         | 149         | 52.8        | 456         | 232         | 50.9        | 35          | 20          | 57.1        |
| Maracaibo     | 174         | 157         | 90.2        | 370         | 315         | 85.1        | 98          | 79          | 80.6        | 446         | 393         | 88.1        |
| <b>ALL</b>    | <b>2936</b> | <b>1482</b> | <b>50.5</b> | <b>3610</b> | <b>1744</b> | <b>46.7</b> | <b>3527</b> | <b>1274</b> | <b>36.1</b> | <b>3019</b> | <b>1952</b> | <b>64.7</b> |

Conventional hypertension was a conventional BP  $\geq$  140 mmHg systolic or  $\geq$  90 mmHg diastolic or use of antihypertensive drugs.

**Table S5.**

Prevalence of Ambulatory Hypertension by Cohort, Sex and Age.

| Cohort        | Men         |             |             | Women       |             |             | - 40-59 years |             |             | 60-79 years |             |             |
|---------------|-------------|-------------|-------------|-------------|-------------|-------------|---------------|-------------|-------------|-------------|-------------|-------------|
|               | N           | Cases       | Crude rate  | N           | Cases       | Crude rate  | N             | Cases       | Crude rate  | N           | Cases       | Crude rate  |
| Copenhagen    | 1116        | 609         | 54.6        | 1026        | 436         | 42.5        | 1067          | 417         | 39.1        | 1075        | 628         | 58.4        |
| Ohasama       | 436         | 243         | 55.7        | 839         | 366         | 43.6        | 572           | 175         | 30.6        | 703         | 434         | 61.7        |
| Noorderkempen | 475         | 176         | 37.1        | 468         | 156         | 33.3        | 641           | 170         | 26.5        | 302         | 162         | 53.6        |
| Montevideo    | 440         | 238         | 54.1        | 522         | 233         | 44.6        | 578           | 244         | 42.2        | 384         | 227         | 59.1        |
| JingNing      | 86          | 54          | 62.8        | 103         | 57          | 55.3        | 115           | 63          | 54.8        | 74          | 48          | 64.9        |
| EPOGH         | 209         | 121         | 57.9        | 282         | 138         | 48.9        | 456           | 238         | 52.2        | 35          | 21          | 60.0        |
| Maracaibo     | 174         | 121         | 69.5        | 370         | 241         | 65.1        | 98            | 58          | 59.2        | 446         | 304         | 68.2        |
| <b>ALL</b>    | <b>2936</b> | <b>1482</b> | <b>50.5</b> | <b>3610</b> | <b>1744</b> | <b>46.7</b> | <b>3527</b>   | <b>1365</b> | <b>38.7</b> | <b>3019</b> | <b>1824</b> | <b>60.4</b> |

Ambulatory hypertension was a 24-hour BP  $\geq$  130 mmHg systolic or  $\geq$  80 mmHg diastolic or use of antihypertensive drugs.



**Table S6.**

Crude and Sex and Age Standardized Prevalence of Daytime and Nighttime Ambulatory Hypertension by Cohort in 6546 Participants Aged 40-80 Years.

| Cohort        | N           | Daytime Hypertension |                         |                    | Nighttime Hypertension |                         |                    |
|---------------|-------------|----------------------|-------------------------|--------------------|------------------------|-------------------------|--------------------|
|               |             | Cases                | Crude rate              | Standardized Rate* | Cases                  | Crude rate              | Standardized Rate* |
| Copenhagen    | 2142        | 1230                 | 57.4 (55.3-59.5)        | 56.0 (54.8-57.6)   | 986                    | 46.0 (43.9-48.1)        | 44.8 (43.7-46.5)   |
| Ohasama       | 1275        | 645                  | 50.6 (47.8-53.3)        | 50.1 (47.3-53.3)   | 615                    | 48.2 (45.5-51.0)        | 47.5 (44.8-50.7)   |
| Noorderkempen | 943         | 364                  | 38.6 (35.5-41.7)        | 41.8 (38.6-45.5)   | 345                    | 36.6 (33.5-39.7)        | 40.3 (37.2-43.9)   |
| Montevideo    | 962         | 492                  | 51.1 (48.0-54.3)        | 51.8 (48.7-55.3)   | 496                    | 51.6 (48.4-54.7)        | 52.7 (49.7-56.2)   |
| JingNing      | 189         | 105                  | 55.6 (48.5-62.6)        | 56.4 (49.7-63.9)   | 130                    | 68.8 (62.2-75.4)        | 69.7 (63.4-76.6)   |
| EPOGH         | 491         | 272                  | 55.4 (51.0-59.8)        | 56.3 (48.3-65.1)   | 256                    | 52.1 (47.7-56.6)        | 57.6 (50.1-66.0)   |
| Maracaibo     | 544         | 334                  | 61.4 (57.3-65.5)        | 59.2 (53.7-65.3)   | 399                    | 73.3 (69.6-77.1)        | 70.0 (64.7-75.9)   |
| <b>ALL</b>    | <b>6546</b> | <b>3442</b>          | <b>52.6 (51.4-53.8)</b> | <b>-</b>           | <b>3227</b>            | <b>49.3 (48.1-50.5)</b> | <b>-</b>           |

Daytime hypertension was a daytime ambulatory BP  $\geq$  135 mmHg systolic or  $\geq$  85 mmHg diastolic or use of antihypertensive drugs. Nighttime hypertension was a nighttime ambulatory BP  $\geq$  120 mmHg systolic or  $\geq$  70 mmHg diastolic or use of antihypertensive drugs.

\*Rates were standardized to the distribution of sex and age in the whole study population (55.2% women, 53.9% between 40 and 60 years).

**Table S7.**

Treatment and Control Rates of Daytime and Nighttime Ambulatory Hypertension by Cohort.

| Cohort        | Daytime Hypertension |                        |                            |                    | Nighttime Hypertension |                        |                            |                    |
|---------------|----------------------|------------------------|----------------------------|--------------------|------------------------|------------------------|----------------------------|--------------------|
|               | All HT               | Treated and Controlled | Treated and Not Controlled | Not Treated        | All HT                 | Treated and Controlled | Treated and Not Controlled | Not Treated        |
| Copenhagen    | 1230                 | 103 (8.4)              | 216 (17.5)                 | 911 (74.1)         | 986                    | 127 (12.9)             | 192 (19.5)                 | 667 (67.6)         |
| Ohasama       | 645                  | 253 (39.2)             | 185 (28.7)                 | 207 (32.1)         | 615                    | 247 (40.2)             | 191 (31.1)                 | 177 (28.8)         |
| Noorderkempen | 364                  | 120 (33.0)             | 73 (20.0)                  | 171 (47.0)         | 345                    | 112 (32.4)             | 81 (23.5)                  | 152 (44.1)         |
| Montevideo    | 492                  | 80 (16.2)              | 148 (30.1)                 | 264 (53.7)         | 496                    | 81 (16.3)              | 147 (29.6)                 | 268 (54.0)         |
| JingNing      | 105                  | 10 (9.5)               | 33 (31.4)                  | 62 (59.1)          | 130                    | 8 (6.2)                | 35 (26.9)                  | 87 (66.9)          |
| EPOGH         | 272                  | 73 (26.8)              | 87 (32.0)                  | 112 (41.2)         | 256                    | 65 (25.4)              | 95 (37.1)                  | 96 (37.5)          |
| Maracaibo     | 334                  | 77 (23.0)              | 91 (27.3)                  | 166 (49.7)         | 399                    | 53 (13.3)              | 115 (28.8)                 | 231 (57.9)         |
| <b>ALL</b>    | <b>3442</b>          | <b>71.6 (20.8)</b>     | <b>833 (24.2)</b>          | <b>1893 (55.0)</b> | <b>3227</b>            | <b>693 (21.5)</b>      | <b>856 (26.5)</b>          | <b>1678 (52.0)</b> |

Values are numbers (percentage). Treatment and control rates were assessed among those with hypertension. Daytime hypertension was a daytime ambulatory BP  $\geq$  135 mmHg systolic or a  $\geq$  85 mmHg diastolic or use of antihypertensive drugs. Nighttime hypertension was a nighttime ambulatory BP  $\geq$  120 mmHg systolic or  $\geq$  70 mmHg diastolic or use of antihypertensive drugs.

HT, hypertension

**Figure S1.** Prevalence rates of conventional normotension (green) and hypertension in the IDACO cohorts. Conventional hypertension is broken down by treated and controlled hypertension (yellow), treated and uncontrolled hypertension (orange) and untreated hypertension (red).

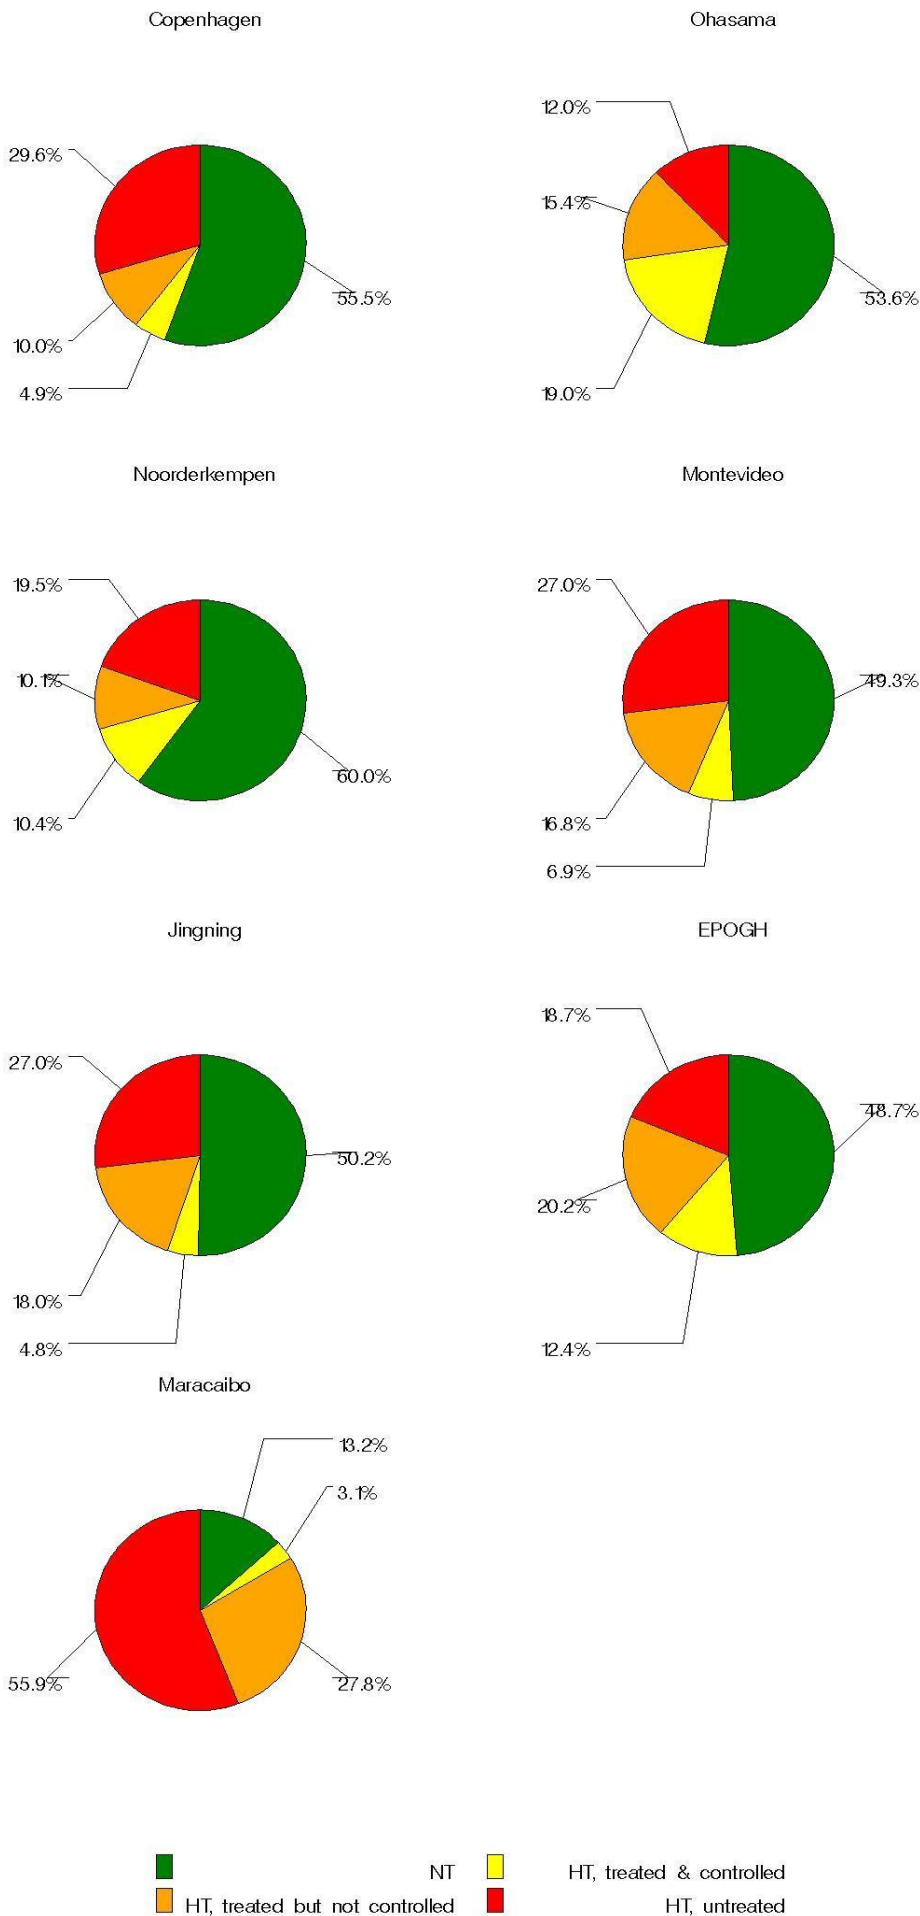

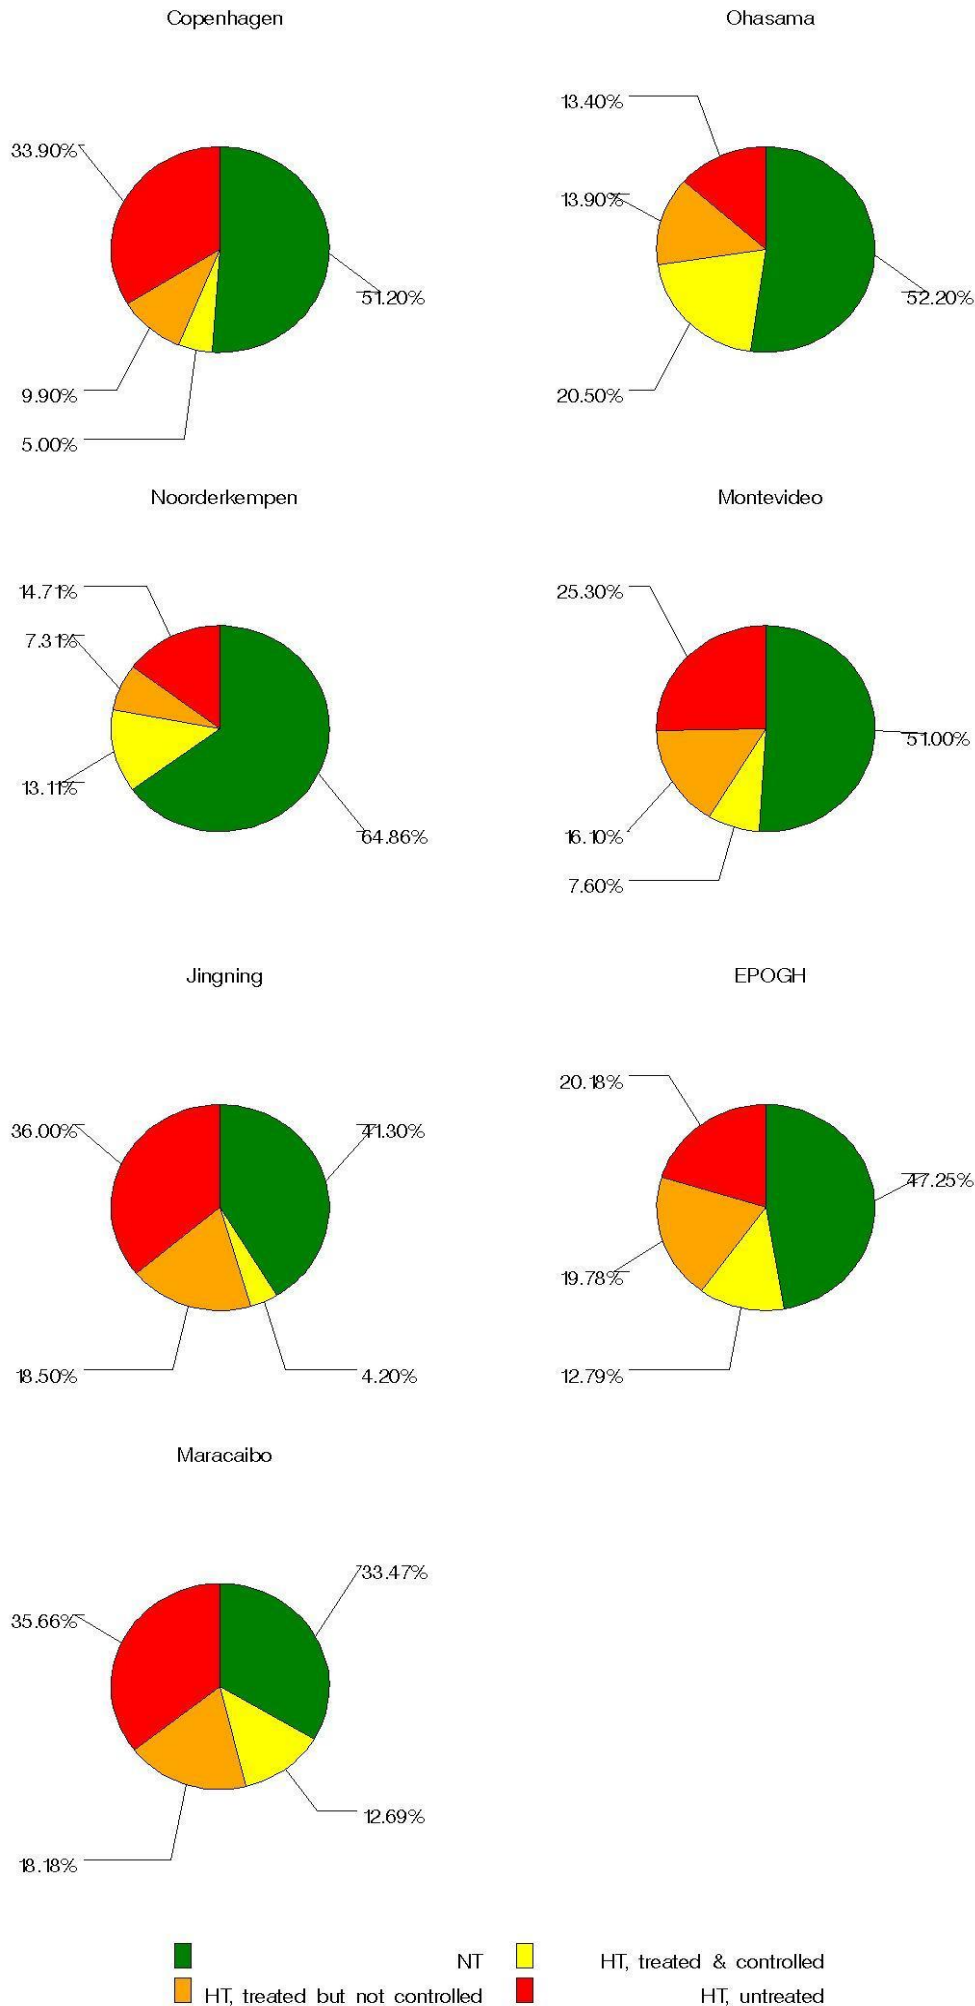

**Figure S2.** Prevalence rates of 24-hour ambulatory normotension (green) and hypertension in the IDACO cohorts. Ambulatory hypertension is broken down by treated and controlled hypertension (yellow), treated and uncontrolled hypertension (orange) and untreated hypertension (red).
